# Supplementary material
Source: PubMed Central journal article supplement (PMC4299230)
Supplement: pnas.1417792112.sd01.pdf [file pnas.1417792112.sd01.pdf]

Table S1. Measured magnesium isotopic ratios in mammals and plants from La Lopé National Park, Gabon

| Sample number<br>SEGC n°    | Origin         | Taxon                          | maturity | sex    | Tissue | Tooth    | Sample weight for<br>Mg analysis (in mg) | $\delta^{26}\text{Mg}$<br>average (‰) | $2\sigma$ | $\delta^{26}\text{Mg}$<br>average (‰) | $2\sigma$ | n | Log(Sr/Ca) | Log(Ba/Ca) | Log(Mg/Ca) | $\delta^{13}\text{C}$<br>V-PDB (‰) | $\delta^{18}\text{O}$<br>V-PDB (‰) | Mg<br>ppm |  |
|-----------------------------|----------------|--------------------------------|----------|--------|--------|----------|------------------------------------------|---------------------------------------|-----------|---------------------------------------|-----------|---|------------|------------|------------|------------------------------------|------------------------------------|-----------|--|
| <b>Faunivores</b>           |                |                                |          |        |        |          |                                          |                                       |           |                                       |           |   |            |            |            |                                    |                                    |           |  |
| 86                          | La Lopé, Gabon | <i>Carnivora indet</i>         | -        | -      | enamel | RM       | 0.71                                     | -0.14                                 | 0.04      | -0.09                                 | 0.03      | 4 | -0.6       | -1.8       | 0.8        | -13.56                             | -                                  | 7700      |  |
| 91                          | La Lopé, Gabon | <i>Carnivora indet</i>         | adult    | -      | enamel | Lc       | 1.42                                     | -0.54                                 | 0.06      | -0.30                                 | 0.06      | 4 | -0.3       | -2.2       | 0.7        | -21.45                             | -                                  | 5078      |  |
| 69                          | La Lopé, Gabon | <i>Carnivora indet</i>         | adult    | -      | enamel | Lc       | 0.85                                     | -0.32                                 | 0.16      | -0.16                                 | 0.07      | 4 | 0.5        | -0.7       | 0.5        | -15.94                             | -7.31                              | 3998      |  |
| 10                          | La Lopé, Gabon | <i>Genetta servalina?</i>      | adult    | male   | enamel | I        | 0.66                                     | -0.05                                 | 0.08      | -0.03                                 | 0.07      | 4 | 0.3        | -0.2       | 0.6        | -14.20                             | -                                  | 5616      |  |
| 3                           | La Lopé, Gabon | <i>Genetta sp.</i>             | adult    | male   | enamel | Lc       | 0.50                                     | -0.09                                 | 0.08      | 0.01                                  | 0.04      | 4 | 0.5        | -0.2       | 0.8        | -12.55                             | -                                  | 9270      |  |
| <b>Omnivores/Frugivores</b> |                |                                |          |        |        |          |                                          |                                       |           |                                       |           |   |            |            |            |                                    |                                    |           |  |
| 31                          | La Lopé, Gabon | <i>Mandrillus sphinx</i>       | adult    | female | enamel | LM3      | 0.31                                     | -0.01                                 | 0.07      | -0.01                                 | 0.04      | 4 | 0.4        | -0.7       | 0.6        | -17.82                             | -4.93                              | 3276      |  |
| 38                          | La Lopé, Gabon | <i>Mandrillus sphinx</i>       | juvenile | -      | enamel | RM3      | 0.34                                     | -0.60                                 | 0.08      | -0.29                                 | 0.04      | 4 | -0.1       | -1.3       | 0.3        | -17.11                             | -7.43                              | 3467      |  |
| 42                          | La Lopé, Gabon | <i>Mandrillus sphinx</i>       | adult    | -      | enamel | -        | 0.34                                     | -0.26                                 | 0.01      | -0.14                                 | 0.02      | 4 | -0.1       | -1.5       | 0.5        | -17.08                             | -1.63                              | 1639      |  |
| 50                          | La Lopé, Gabon | <i>Mandrillus sphinx</i>       | adult    | male   | enamel | LM2      | 0.33                                     | -0.13                                 | 0.08      | -0.06                                 | 0.02      | 4 | 0.3        | -0.7       | 0.5        | -17.06                             | -6.28                              | 2008      |  |
| 52                          | La Lopé, Gabon | <i>Mandrillus sphinx</i>       | adult    | male   | enamel | RM3      | 0.81                                     | -0.31                                 | 0.13      | -0.16                                 | 0.06      | 4 | 0.8        | 0.0        | 0.4        | -17.54                             | -5.36                              | 4103      |  |
| 61                          | La Lopé, Gabon | <i>Mandrillus sphinx</i>       | adult    | female | enamel | LM3      | 0.76                                     | -0.70                                 | 0.14      | -0.45                                 | 0.06      | 4 | 0.0        | -1.0       | 0.5        | -16.76                             | -4.31                              | 4034      |  |
| 84                          | La Lopé, Gabon | <i>Mandrillus sphinx</i>       | adult    | female | enamel | RM3      | 0.89                                     | 0.01                                  | 0.14      | 0.00                                  | 0.07      | 4 | 0.5        | -0.5       | 0.3        | -16.44                             | -6.18                              | 3229      |  |
| 85                          | La Lopé, Gabon | <i>Mandrillus sphinx</i>       | adult    | female | enamel | Rm3      | 0.54                                     | -0.46                                 | 0.09      | -0.22                                 | 0.02      | 4 | 0.2        | -1.1       | 0.4        | -16.82                             | -5.98                              | 4105      |  |
| 20                          | La Lopé, Gabon | <i>Potamochoerus porcus</i>    | juvenile | -      | enamel | -        | 0.72                                     | -0.08                                 | 0.11      | -0.04                                 | 0.05      | 4 | -          | -          | -          | -15.26                             | -6.93                              | -         |  |
| 21                          | La Lopé, Gabon | <i>Potamochoerus porcus</i>    | juvenile | -      | enamel | LP2      | 0.26                                     | -0.11                                 | 0.06      | -0.05                                 | 0.02      | 4 | -          | -          | -          | -15.16                             | -6.46                              | -         |  |
| 23                          | La Lopé, Gabon | <i>Potamochoerus porcus</i>    | adult    | male   | enamel | LP3      | 0.69                                     | -0.26                                 | 0.05      | -0.15                                 | 0.05      | 4 | 0.7        | -0.6       | 0.4        | -16.37                             | -6.29                              | 3891      |  |
| 24                          | La Lopé, Gabon | <i>Potamochoerus porcus</i>    | adult    | -      | enamel | RP2      | 0.52                                     | -0.62                                 | 0.03      | -0.32                                 | 0.00      | 4 | 0.8        | -0.2       | 0.8        | -16.08                             | -6.91                              | 7033      |  |
| 25                          | La Lopé, Gabon | <i>Potamochoerus porcus</i>    | juvenile | -      | enamel | RM1      | 0.83                                     | -0.49                                 | 0.14      | -0.25                                 | 0.05      | 4 | 0.4        | -1.1       | 0.8        | -17.59                             | -6.22                              | 8954      |  |
| 26                          | La Lopé, Gabon | <i>Potamochoerus porcus</i>    | subadult | -      | enamel | RP2      | 0.50                                     | -0.19                                 | 0.17      | -0.09                                 | 0.07      | 4 | 0.7        | -0.6       | 0.2        | -16.30                             | -7.65                              | 2421      |  |
| 60                          | La Lopé, Gabon | <i>Potamochoerus porcus</i>    | adult    | -      | enamel | RM1      | 1.23                                     | -0.76                                 | 0.14      | -0.44                                 | 0.12      | 4 | 0.6        | -0.9       | 0.0        | -16.83                             | -7.11                              | 1340      |  |
| <b>Grazers</b>              |                |                                |          |        |        |          |                                          |                                       |           |                                       |           |   |            |            |            |                                    |                                    |           |  |
| 13                          | La Lopé, Gabon | <i>Syncerus caffer nanus</i>   | adult    | -      | enamel | M1 or M2 | 0.35                                     | -0.47                                 | 0.11      | -0.24                                 | 0.03      | 4 | 0.3        | -0.3       | 0.5        | -3.02                              | -2.54                              | 3320      |  |
| 14                          | La Lopé, Gabon | <i>Syncerus caffer nanus</i>   | adult    | -      | enamel | RM1      | 0.63                                     | -0.54                                 | 0.08      | -0.27                                 | 0.04      | 4 | -          | -          | -          | -4.59                              | -3.18                              | -         |  |
| 15                          | La Lopé, Gabon | <i>Syncerus caffer nanus</i>   | adult    | -      | enamel | Rm2      | 0.41                                     | -0.87                                 | 0.08      | -0.44                                 | 0.07      | 4 | -0.3       | -0.8       | 0.4        | -7.13                              | -5.16                              | 2504      |  |
| 35                          | La Lopé, Gabon | <i>Syncerus caffer nanus</i>   | adult    | female | enamel | Rm2      | 0.47                                     | -0.34                                 | 0.04      | -0.16                                 | 0.07      | 4 | 0.4        | -0.1       | 0.2        | -5.05                              | -5.36                              | 2690      |  |
| 58                          | La Lopé, Gabon | <i>Syncerus caffer nanus</i>   | juvenile | -      | enamel | LM       | 0.71                                     | -0.17                                 | 0.06      | -0.08                                 | 0.05      | 4 | 0.3        | -0.3       | 0.3        | -9.08                              | -5.08                              | 2899      |  |
| 65                          | La Lopé, Gabon | <i>Syncerus caffer nanus</i>   | adult    | -      | enamel | LP3      | 0.57                                     | -0.42                                 | 0.16      | -0.20                                 | 0.13      | 4 | 0.2        | -0.5       | 0.3        | -4.73                              | -4.39                              | 2588      |  |
| 74                          | La Lopé, Gabon | <i>Syncerus caffer nanus</i>   | adult    | -      | enamel | Rm       | 0.94                                     | -0.64                                 | 0.07      | -0.36                                 | 0.07      | 4 | 0.5        | 0.1        | 0.2        | -3.73                              | -4.06                              | 2983      |  |
| 90                          | La Lopé, Gabon | <i>Syncerus caffer nanus</i>   | adult    | -      | enamel | LM       | 0.72                                     | -0.66                                 | 0.06      | -0.35                                 | 0.02      | 4 | 0.2        | -0.4       | 0.2        | -4.46                              | -4.15                              | 3038      |  |
| 92                          | La Lopé, Gabon | <i>Syncerus caffer nanus</i>   | adult    | -      | enamel | LM2      | 0.72                                     | -0.65                                 | 0.15      | -0.34                                 | 0.10      | 4 | 0.3        | -0.4       | 0.5        | -                                  | -                                  | 3745      |  |
| 93                          | La Lopé, Gabon | <i>Syncerus caffer nanus</i>   | adult    | -      | enamel | M        | 1.34                                     | -0.48                                 | 0.13      | -0.25                                 | 0.04      | 4 | 0.4        | 0.0        | 0.4        | -                                  | -                                  | 3366      |  |
| 97                          | La Lopé, Gabon | <i>Syncerus caffer nanus</i>   | adult    | -      | enamel | M1 or M2 | 0.80                                     | -0.78                                 | 0.02      | -0.36                                 | 0.09      | 4 | 0.0        | -0.7       | 0.5        | -                                  | -                                  | 2889      |  |
| <b>Browsers</b>             |                |                                |          |        |        |          |                                          |                                       |           |                                       |           |   |            |            |            |                                    |                                    |           |  |
| 22                          | La Lopé, Gabon | <i>Loxodonta cyclotis</i>      | juvenile | -      | enamel | LM       | 1.06                                     | -0.87                                 | 0.08      | -0.46                                 | 0.08      | 4 | 0.2        | -1.1       | 0.3        | -19.94                             | -5.44                              | 2790      |  |
| LC1                         | La Lopé, Gabon | <i>Loxodonta cyclotis</i>      | juvenile | -      | enamel | LM       | 0.97                                     | -1.01                                 | 0.06      | -0.52                                 | 0.02      | 4 | 0.5        | -0.7       | 0.1        | -15.78                             | -3.32                              | 2153      |  |
| LC2                         | La Lopé, Gabon | <i>Loxodonta cyclotis</i>      | juvenile | -      | enamel | LM       | 0.68                                     | -0.78                                 | 0.05      | -0.40                                 | 0.04      | 4 | 0.2        | -0.9       | 0.2        | -17.86                             | -4.14                              | 2473      |  |
| LC3                         | La Lopé, Gabon | <i>Loxodonta cyclotis</i>      | adult    | -      | enamel | LM2      | 0.79                                     | -0.54                                 | 0.05      | -0.29                                 | 0.03      | 4 | 0.5        | -0.3       | 0.5        | -16.84                             | -2.68                              | 5381      |  |
| LC4                         | La Lopé, Gabon | <i>Loxodonta cyclotis</i>      | adult    | -      | enamel | LM2      | 0.59                                     | -0.66                                 | 0.08      | -0.33                                 | 0.03      | 4 | 0.5        | -0.2       | 0.3        | -18.32                             | -3.11                              | 3192      |  |
| LC5                         | La Lopé, Gabon | <i>Loxodonta cyclotis</i>      | adult    | -      | enamel | LM       | 0.99                                     | -1.08                                 | 0.12      | -0.55                                 | 0.07      | 4 | 0.3        | -0.7       | 0.2        | -16.30                             | -4.68                              | 1973      |  |
| LC32                        | La Lopé, Gabon | <i>Loxodonta cyclotis</i>      | -        | -      | enamel | M        | 0.81                                     | -0.87                                 | 0.05      | -0.45                                 | 0.08      | 4 | 0.4        | -0.5       | 0.3        | -16.68                             | -3.74                              | 2717      |  |
| 39                          | La Lopé, Gabon | <i>Gorilla gorilla gorilla</i> | young    | male   | enamel | RM1      | 0.84                                     | -0.70                                 | 0.11      | -0.36                                 | 0.05      | 4 | 0.4        | -0.8       | 0.2        | -17.54                             | -6.05                              | 3220      |  |
| 40                          | La Lopé, Gabon | <i>Gorilla gorilla gorilla</i> | adult    | male   | enamel | LM3      | 0.77                                     | -0.74                                 | 0.14      | -0.24                                 | 0.04      | 4 | 0.2        | -0.2       | 0.2        | -16.49                             | -6.49                              | 3114      |  |
| 41                          | La Lopé, Gabon | <i>Gorilla gorilla gorilla</i> | adult    | male   | enamel | M2       | 0.64                                     | -0.74                                 | 0.07      | -0.36                                 | 0.03      | 4 | 0.6        | -0.4       | 0.7        | -16.10                             | -6.92                              | 8221      |  |
| 72                          | La Lopé, Gabon | <i>Gorilla gorilla gorilla</i> | adult    | -      | enamel | I        | 0.90                                     | -0.70                                 | 0.09      | -0.37                                 | 0.03      | 4 | 0.4        | 0.0        | 0.4        | -7.24                              | -4.01                              | 3910      |  |
| 43                          | La Lopé, Gabon | <i>Tragelaphus scriptus</i>    | adult    | male   | enamel | Rp3      | 0.34                                     | -0.58                                 | 0.04      | -0.28                                 | 0.03      | 4 | 0.5        | 0.2        | 0.1        | -17.51                             | -5.58                              | 2075      |  |
| 45                          | La Lopé, Gabon | <i>Tragelaphus scriptus</i>    | adult    | male   | enamel | LM3      | 0.42                                     | -0.53                                 | 0.09      | -0.26                                 | 0.08      | 4 | 0.7        | 0.2        | 0.4        | -16.01                             | -5.26                              | 4186      |  |
| 19                          | La Lopé, Gabon | <i>Tragelaphus scriptus</i>    | adult    | male   | enamel | M        | 0.72                                     | -0.65                                 | 0.10      | -0.33                                 | 0.01      | 4 | 0.6        | -0.2       | 0.3        | -                                  | -                                  | 3565      |  |
| 47                          | La Lopé, Gabon | <i>Cephalophus monticola</i>   | adult    | -      | enamel | Rm3      | 0.65                                     | -0.91                                 | 0.10      | -0.47                                 | 0.07      | 4 | 0.4        | -0.8       | 0.4        | -16.19                             | -6.67                              | 948       |  |
| 89                          | La Lopé, Gabon | <i>Cephalophus nigrifrons</i>  | -        | -      | enamel | M        | 0.72                                     | -0.89                                 | 0.11      | -0.46                                 | 0.06      | 4 | 0.8        | 0.2        | 0.6        | -15.81                             | -5.15                              | 5856      |  |
| 64                          | La Lopé, Gabon | <i>Cephalophus sp.</i>         | -        | -      | enamel | LP2      | 0.82                                     | -0.66                                 | 0.12      | -0.34                                 | 0.05      | 4 | 0.4        | -0.7       | 0.6        | -15.37                             | -5.25                              | 1758      |  |
| 17                          | La Lopé, Gabon | <i>Cephalophus sylvicultor</i> | -        | -      | enamel | LP3      | 0.66                                     | -1.29                                 | 0.21      | -0.66                                 | 0.11      | 4 | 0.5        | -0.5       | 0.1        | -14.22                             | -5.63                              | 2256      |  |
| <b>Plants</b>               |                |                                |          |        |        |          |                                          |                                       |           |                                       |           |   |            |            |            |                                    |                                    |           |  |
| PG2                         | La Lopé, Gabon | <i>Uapaca sp.</i>              | leaves   | -      | -      | -        | 121.74                                   | -0.63                                 | 0.03      | -0.33                                 | 0.04      | 4 | 1.3        | 1.0        | 0.0        | -28.94                             | -                                  | 245       |  |
| PG3                         | La Lopé, Gabon | <i>Anthoecleista vogelii</i>   | leaves   | -      | -      | -        | 113.20                                   | -0.48                                 | 0.16      | -0.25                                 | 0.06      | 4 | 1.2        | 0.6        | 0.5        | -28.71                             | -                                  | 37        |  |
| PG4                         | La Lopé, Gabon | <i>Klainea sp.</i>             | leaves   | -      | -      | -        | 107.76                                   | -1.41                                 | 0.09      | -0.73                                 | 0.04      | 4 | 0.9        | 0.8        | 1.4        | -29.24                             | -                                  | 521       |  |
| PG5                         | La Lopé, Gabon | <i>Lophira alata</i>           | leaves   | -      | -      | -        | 104.34                                   | -1.60                                 | 0.09      | -0.83                                 | 0.06      | 4 | -          | -          | -          | -29.30                             | -                                  | 205       |  |
| PM1                         | La Lopé, Gabon | <i>Myrsine sp.</i>             | leaves   | -      | -      | -        | 126.83                                   | -0.65                                 | 0.03      | -0.33                                 | 0.04      | 2 | 1.1        | 0.4        | -0.7       | -32.04                             | -                                  | 649       |  |
| PM2                         | La Lopé, Gabon | <i>Lophira sp.</i>             | leaves   | -      | -      | -        | 111.34                                   | -1.05                                 | 0.02      | -0.53                                 | 0.02      | 2 | 0.9        | 0.5        | 2.1        | -34.58                             | -                                  | 1812      |  |
| PM4                         | La Lopé, Gabon | <i>Megaphrynium sp.</i>        | leaves   | -      | -      | -        | 118.51                                   | -0.79                                 | 0.12      | -0.40                                 | 0.04      | 2 | 0.9        | 0.7        | 2.7        | -34.06                             | -                                  | 1962      |  |
| PM5                         | La Lopé, Gabon | <i>Gambeya africana</i>        | leaves   | -      | -      | -        | 112.70                                   | -1.27                                 | 0.05      | -0.63                                 | 0.01      | 2 | -          | -          | -          | -29.82                             | -                                  | 1643      |  |
| PS1                         | La Lopé, Gabon | <i>Psidium guineensis</i>      | leaves   | -      | -      | -        | 120.63                                   | -1.54                                 | 0.01      | -0.79                                 | 0.04      | 2 | 1.2        | 1.0        | 1.8        | -31.24                             | -                                  | 1283      |  |
| PS2                         | La Lopé, Gabon | gramineae indet.               | leaves   | -      | -      | -        | 104.75                                   | -1.63                                 | 0.00      | -0.82                                 | 0.01      | 2 | 1.1        | 1.0        | 2.3        | -11.82                             | -                                  | 484       |  |
| PS4                         | La Lopé, Gabon | <i>Crassopertys sp.</i>        | leaves   | -      | -      | -        | 123.70                                   | -0.50                                 | 0.00      | -0.25                                 | 0.02      | 2 | 1.4        | 1.0        | 1.7        | -30.87                             | -                                  | 1030      |  |
| PS5                         | La Lopé, Gabon | <i>Naucllea sp.</i>            | leaves   | -      | -      | -        | 119.41                                   | -1.13                                 | 0.06      | -0.57                                 | 0.04      | 2 | 1.3        | 0.7        | 1.9        | -30.94                             | -                                  | 1179      |  |
| <b>Feces</b>                |                |                                |          |        |        |          |                                          |                                       |           |                                       |           |   |            |            |            |                                    |                                    |           |  |
| du16                        | La Lopé, Gabon | <i>Genetta sp.</i>             | feces    | -      | -      | -        | -                                        | -1.49                                 | 0.07      | -0.73                                 | 0.04      | 2 | -          | -          | -          | -                                  | -                                  | -         |  |
| du11                        | La Lopé, Gabon | <i>Mandrillus sphinx</i>       | feces    | -      | -      | -        | -                                        | -1.66                                 | 0.13      | -0.83                                 | 0.13      | 2 | -          | -          | -          | -                                  | -                                  | -         |  |
| du15                        | La Lopé, Gabon | <i>Mandrillus sphinx</i>       | feces    | -      | -      | -        | -                                        | -1.82                                 | -         | -0.93                                 | -         | 1 | -          | -          | -          | -                                  | -                                  | -         |  |
| du8                         | La Lopé, Gabon | <i>Mandrillus sphinx</i>       | feces    | -      | -      | -        | -                                        | -1.79                                 | -         | -0.86                                 | -         | 1 | -          | -          | -          | -                                  | -                                  | -         |  |
| du10                        | La Lopé, Gabon | <i>Potamochoerus porcus</i>    | feces    | -      | -      |          |                                          |                                       |           |                                       |           |   |            |            |            |                                    |                                    |           |  |
